# Supplementary material for: Adenovirus-Vectored African Swine Fever Virus pp220 Induces Robust Antibody, IFN-γ, and CTL Responses in Pigs
Source: PubMed Central journal article supplement (PMC9195138; doi:10.3389/fvets.2022.921481), 2022-05-31
Supplement: Table_1.pdf [file Table_1.pdf]

YP\_0097026 : YTNAAAREBE... 600  
YP\_0097035 : YTNAAAREBE... 600  
QZK26792.1 : YTNAAAREBE... 600  
YP\_0097036 : YTNAAAREBE... 600  
QID21266.1 : YTNAAAREBE... 600  
POCA04.1 : YTNAAAREBE... 600  
POCA02.1 : YTNAAAREBE... 600  
YP\_0097029 : YNNAAREBE... 600  
AXB50010.1 : YNNAAREBE... 600  
AXB49666.1 : YNNAAREBE... 600  
CAD7112308 : YNNAAREBE... 600  
QRY19118.1 : YNNAAREBE... 600  
POCA01.1 : YNNAAREBE... 600  
YP\_0097028 : YNNAAREBE... 600  
POCA03.1 : YTNAAAREBE... 600

\* 620 \* 640 \* 660 \* 680 \* 700 \* 720 \* 740 \*  
YP\_0099272 : SPAVDLARGHVG... 750  
AZP54139.1 : SPAVDLARGHVG... 750  
QIE06881.1 : SPAVDLARGHVG... 750  
QGJ83454.1 : SPAVDLARGHVG... 750  
AYW34063.1 : SPAVDLARGHVG... 750  
QLF78620.1 : SPAVDLARGHVG... 750  
QTP96400.1 : SPAVDLARGHVG... 750  
QBH90765.1 : SPAVDLARGHVG... 750  
QOY24398.1 : SPAVDLARGHVG... 750  
QSG73791.1 : SPAVDLARGHVG... 750  
QTE18752.1 : SPAVDLARGHVG... 750  
VFW48026.1 : SPAVDLARGHVG... 750  
QW03225.1 : SPAVDLARGHVG... 750  
QW03039.1 : SPAVDLARGHVG... 750  
VWV94185.1 : SPAVDLARGHVG... 750  
CAD0059543 : SPAVDLARGHVG... 750  
QXP50051.1 : SPAVDLARGHVG... 750  
CAD7112603 : SPAVDLARGHVG... 750  
AXZ96054.1 : SPAVDLARGHVG... 750  
QED90535.1 : SPAVDLARGHVG... 750  
VWV94190.1 : SPAVDLARGHVG... 750  
QEY87898.1 : SPAVDLARGHVG... 750  
QCV56805.1 : SPAVDLARGHVG... 750  
QPB67618.1 : SPAVDLARGHVG... 750  
QQQ60377.1 : SPAVDLARGHVG... 750  
QUQ60191.1 : SPAVDLARGHVG... 750  
SPS73515.1 : SPAVDLARGHVG... 750  
QDL88123.1 : SPAVDLARGHVG... 750  
QIA61506.1 : SPAVDLARGHVG... 750  
QTZ19752.1 : SPAVDLARGHVG... 750  
QIM07715.1 : SPAVDLARGHVG... 750  
QIM07948.1 : SPAVDLARGHVG... 750  
QIM08183.1 : SPAVDLARGHVG... 750  
YP\_0097024 : SPAVDLARGHVG... 750  
YP\_0097038 : SPAVDLARGHVG... 750  
YP\_0097023 : SPAVDLARGHVG... 750  
YP\_0097035 : SPAVDLARGHVG... 750  
QZK26792.1 : SPAVDLARGHVG... 750  
YP\_0097036 : SPAVDLARGHVG... 750  
QID21266.1 : SPAVDLARGHVG... 750  
POCA04.1 : SPAVDLARGHVG... 750  
POCA02.1 : SPAVDLARGHVG... 750  
YP\_0097029 : SPAVDLARGHVG... 750  
AXB50010.1 : SPAVDLARGHVG... 750  
AXB49666.1 : SPAVDLARGHVG... 750  
CAD7112308 : SPAVDLARGHVG... 750  
QRY19118.1 : SPAVDLARGHVG... 750  
POCA01.1 : SPAVDLARGHVG... 750  
YP\_0097028 : SPAVDLARGHVG... 750





















QOW03225.1 : PTLVQIGKDRFDTRLIRNLIFFITNIQRLRLRLRNLELSQFRNVLVSPDHIINPSTIEYGFSTTGPSETFSDKQYDSDIRIL : 2476  
QOW03039.1 : PTLVQIGKDRFDTRLIRNLIFFITNIQRLRLRLRNLELSQFRNVLVSPDHIINPSTIEYGFSTTGPSETFSDKQYDSDIRIL : 2476  
VVW94185.1 : PTLVQIGKDRFDTRLIRNLIFFITNIQRLRLRLRNLELSQFRNVLVSPDHIINPSTIEYGFSTTGPSETFSDKQYDSDIRIL : 2476  
CAD0059543 : PTLVQIGKDRFDTRLIRNLIFFITNIQRLRLRLRNLELSQFRNVLVSPDHIINPSTIEYGFSTTGPSETFSDKQYDSDIRIL : 2476  
QXP50051.1 : PTLVQIGKDRFDTRLIRNLIFFITNIQRLRLRLRNLELSQFRNVLVSPDHIINPSTIEYGFSTTGPSETFSDKQYDSDIRIL : 2476  
CAD7112603 : PTLVQIGKDRFDTRLIRNLIFFITNIQRLRLRLRNLELSQFRNVLVSPDHIINPSTIEYGFSTTGPSETFSDKQYDSDIRIL : 2476  
AXZ96054.1 : PTLVQIGKDRFDTRLIRNLIFFITNIQRLRLRLRNLELSQFRNVLVSPDHIINPSTIEYGFSTTGPSETFSDKQYDSDIRIL : 2476  
QED90535.1 : PTLVQIGKDRFDTRLIRNLIFFITNIQRLRLRLRNLELSQFRNVLVSPDHIINPSTIEYGFSTTGPSETFSDKQYDSDIRIL : 2476  
VVW94190.1 : PTLVQIGKDRFDTRLIRNLIFFITNIQRLRLRLRNLELSQFRNVLVSPDHIINPSTIEYGFSTTGPSETFSDKQYDSDIRIL : 2476  
QEY87898.1 : PTLVQIGKDRFDTRLIRNLIFFITNIQRLRLRLRNLELSQFRNVLVSPDHIINPSTIEYGFSTTGPSETFSDKQYDSDIRIL : 2476  
QGV56805.1 : PTLVQIGKDRFDTRLIRNLIFFITNIQRLRLRLRNLELSQFRNVLVSPDHIINPSTIEYGFSTTGPSETFSDKQYDSDIRIL : 2476  
QPB67618.1 : PTLVQIGKDRFDTRLIRNLIFFITNIQRLRLRLRNLELSQFRNVLVSPDHIINPSTIEYGFSTTGPSETFSDKQYDSDIRIL : 2476  
QUQ60377.1 : PTLVQIGKDRFDTRLIRNLIFFITNIQRLRLRLRNLELSQFRNVLVSPDHIINPSTIEYGFSTTGPSETFSDKQYDSDIRIL : 2476  
QUQ60197.1 : PTLVQIGKDRFDTRLIRNLIFFITNIQRLRLRLRNLELSQFRNVLVSPDHIINPSTIEYGFSTTGPSETFSDKQYDSDIRIL : 2476  
SPS73515.1 : PTLVQIGKDRFDTRLIRNLIFFITNIQRLRLRLRNLELSQFRNVLVSPDHIINPSTIEYGFSTTGPSETFSDKQYDSDIRIL : 2476  
QDL88123.1 : PTLVQIGKDRFDTRLIRNLIFFITNIQRLRLRLRNLELSQFRNVLVSPDHIINPSTIEYGFSTTGPSETFSDKQYDSDIRIL : 2476  
QIA61506.1 : PTLVQIGKDRFDTRLIRNLIFFITNIQRLRLRLRNLELSQFRNVLVSPDHIINPSTIEYGFSTTGPSETFSDKQYDSDIRIL : 2476  
QTZ19752.1 : PTLVQIGKDRFDTRLIRNLIFFITNIQRLRLRLRNLELSQFRNVLVSPDHIINPSTIEYGFSTTGPSETFSDKQYDSDIRIL : 2476  
QIM07715.1 : PTLVQIGKDRFDTRLIRNLIFFITNIQRLRLRLRNLELSQFRNVLVSPDHIINPSTIEYGFSTTGPSETFSDKQYDSDIRIL : 2475  
QIM07948.1 : PTLVQIGKDRFDTRLIRNLIFFITNIQRLRLRLRNLELSQFRNVLVSPDHIINPSTIEYGFSTTGPSETFSDKQYDSDIRIL : 2475  
QIM08183.1 : PTLVQIGKDRFDTRLIRNLIFFITNIQRLRLRLRNLELSQFRNVLVSPDHIINPSTIEYGFSTTGPSETFSDKQYDSDIRIL : 2475  
YP\_0097024 : PTLVQIGKDRFDTRLIRNLIFFITNIQRLRLRLRNLELSQFRNVLVSPDHIINPSTIEYGFSTTGPSETFSDKQYDSDIRIL : 2475  
YP\_0097038 : PTLVQIGKDRFDTRLIRNLIFFITNIQRLRLRLRNLELSQFRNVLVSPDHIINPSTIEYGFSTTGPSETFSDKQYDSDIRIL : 2475  
YP\_0097023 : PTLVQIGKDRFDTRLIRNLIFFITNIQRLRLRLRNLELSQFRNVLVSPDHIINPSTIEYGFSTTGPSETFSDKQYDSDIRIL : 2475  
YP\_0097026 : PTLVQIGKDRFDTRLIRNLIFFITNIQRLRLRLRNLELSQFRNVLVSPDHIINPSTIEYGFSTTGPSETFSDKQYDSDIRIL : 2475  
YP\_0097035 : PTLVQIGKDRFDTRLIRNLIFFITNIQRLRLRLRNLELSQFRNVLVSPDHIINPSTIEYGFSTTGPSETFSDKQYDSDIRIL : 2475  
QZK26792.1 : PTLVQIGKDRFDTRLIRNLIFFITNIQRLRLRLRNLELSQFRNVLVSPDHIINPSTIEYGFSTTGPSETFSDKQYDSDIRIL : 2476  
YP\_0097036 : PTLVQIGKDRFDTRLIRNLIFFITNIQRLRLRLRNLELSQFRNVLVSPDHIINPSTIEYGFSTTGPSETFSDKQYDSDIRIL : 2475  
QID21266.1 : PTLVQIGKDRFDTRLIRNLIFFITNIQRLRLRLRNLELSQFRNVLVSPDHIINPSTIEYGFSTTGPSETFSDKQYDSDIRIL : 2475  
POCA04.1 : PTLVQIGKDRFDTRLIRNLIFFITNIQRLRLRLRNLELSQFRNVLVSPDHIINPSTIEYGFSTTGPSETFSDKQYDSDIRIL : 2475  
POCA02.1 : PTLVQIGKDRFDTRLIRNLIFFITNIQRLRLRLRNLELSQFRNVLVSPDHIINPSTIEYGFSTTGPSETFSDKQYDSDIRIL : 2475  
YP\_0097029 : PALIQIGKDRFDTRLIRNLIFFITNIQRLRLRLRNLELSQFRNVLVSPDHIINPSTIEYGFSTTGPSETFSDKQYDSDIRIL : 2476  
AXB50010.1 : PALIQIGKDRFDTRLIRNLIFFITNIQRLRLRLRNLELSQFRNVLVSPDHIINPSTIEYGFSTTGPSETFSDKQYDSDIRIL : 2477  
AXB49666.1 : PALIQIGKDRFDTRLIRNLIFFITNIQRLRLRLRNLELSQFRNVLVSPDHIINPSTIEYGFSTTGPSETFSDKQYDSDIRIL : 2477  
CAD7112308 : PALIQIGKDRFDTRLIRNLIFFITNIQRLRLRLRNLELSQFRNVLVSPDHIINPSTIEYGFSTTGPSETFSDKQYDSDIRIL : 2474  
QRY19118.1 : PALIQIGKDRFDTRLIRNLIFFITNIQRLRLRLRNLELSQFRNVLVSPDHIINPSTIEYGFSTTGPSETFSDKQYDSDIRIL : 2474  
POCA01.1 : PALIQIGKDRFDTRLIRNLIFFITNIQRLRLRLRNLELSQFRNVLVSPDHIINPSTIEYGFSTTGPSETFSDKQYDSDIRIL : 2475  
YP\_0097028 : PALIQIGKDRFDTRLIRNLIFFITNIQRLRLRLRNLELSQFRNVLVSPDHIINPSTIEYGFSTTGPSETFSDKQYDSDIRIL : 2474  
POCA03.1 : PTLVQIGKDRFDTRLIRNLIFFITNIQRLRLRLRNLELSQFRNVLVSPDHIINPSTIEYGFSTTGPSETFSDKQYDSDIRIL : 2475

**Supplementary Table 1:** List of ASFV isolates used as the source of the pp220 sequences (<https://www.ncbi.nlm.nih.gov/>) and aligned in the supplementary Figure 1.

| Accession #                                                | Isolate; Country                        | Genotype; Source of isolation        | References                      |
|------------------------------------------------------------|-----------------------------------------|--------------------------------------|---------------------------------|
| <a href="#">NC_044959.2</a><br>YP_009927216/<br>CAD2068454 | ASFV Georgia 2007/1<br>Georgia          | Genotype II<br>Domestic Pig          | (Chapman et al., 2011)          |
| <a href="#">MH910496.1</a><br>AZP54139.1                   | Georgia 2008/2<br>Georgia               | Genotype II;<br>Domestic Pig         | (Farlow et al., 2018)           |
| <a href="#">MN393476.1</a><br>QIE06881.1                   | ASFV Wuhan 2019-1<br>China              | Genotype II<br>Domestic pig          | (Xiong, Zhang, Yu, & Wei, 2019) |
| <a href="#">MN172368.1</a><br>QGJ83454                     | China/CAS19-01/2019<br>China            | Genotype II<br>Domestic pig          | (Jia et al., 2020)              |
| <a href="#">MK128995.1</a><br>AYW34063.1                   | China/2018/AnhuiXCGQ<br>China           | Genotype II<br>Domestic pig          | (Bao et al., 2019)              |
| <a href="#">MT496893.1</a><br>QLF78620.1                   | GZ201801<br>China                       | Genotype II<br>Domestic pig - serum  | (Tran et al., 2022)             |
| <a href="#">MW521382.1</a><br>QTP96400.1                   | HuB20<br>China                          | Genotype II<br>Domestic pig          | (Tran et al., 2022)             |
| <a href="#">MK333181.1</a><br>QBH90765.1                   | DB/LN/2018<br>China                     | Genotype II<br>Domestic Pig - Blood  | (Wen et al., 2019)              |
| <a href="#">MT180393.1</a><br>QOY24398.1                   | ASFV_NgheAn_2019<br>Vietnam             | Genotype II<br>Domestic pig          | (Nguyen et al., 2021)           |
| <a href="#">MW465755.1</a><br>QSG73791.1                   | VNUA-ASFV-05L1/HaNam/VN/2020<br>Vietnam | Genotype II<br>Domestic pig -spleen  | (Truong et al., 2021)           |
| <a href="#">MW396979.1</a><br>QTE18752.1                   | ASFV/Timor-Leste/2019/1<br>Timor-Leste  | Genotype II<br>Domestic pig          | (Mileto et al., 2021)           |
| <a href="#">LR536725.1</a><br>VFV48026.1                   | ASFV Belgium 2018/1<br>Belgium          | Genotype II<br>Domestic Pig          | (Jan H. Forth et al., 2019)     |
| <a href="#">MT847623.2</a><br>QOW03225.1                   | Pol19_53050_C1959/19<br>Poland          | Genotype II<br>Domestic pig          | (Mazur-Panasiuk, 2020)          |
| <a href="#">MT847622.1</a><br>QOW03039.1                   | Pol17_31177_O81<br>Poland               | Genotype II<br>Domestic pig          | (Mazur-Panasiuk, 2020)          |
| <a href="#">LR722599.1</a><br>VWV94185.1                   | ASFV Moldova 2017/1<br>Moldova          | Genotype II<br>Domestic pig - spleen | (J. H. Forth et al., 2019)      |
| <a href="#">LR813622.1</a><br>CAD0059543.1                 | Tanzania/Rukwa/2017/1<br>SW Tanzania    | Genotype II<br>Domestic pig          | (Njau et al., 2021)             |
| <a href="#">MW856068.1</a><br>QXP50051.1                   | MAL/19/Karonga<br>Malawi                | Genotype II<br>Domestic pig          | (Hakizimana et al., 2020)       |
| <a href="#">LR899193.1</a><br>CAD7112603.1                 | ASFV Germany 2020/1<br>Germany          | Genotype II<br>Wild Boar             | (Sauter-Louis, 2021)            |

|                                                            |                                             |                                                               |                                                                                       |
|------------------------------------------------------------|---------------------------------------------|---------------------------------------------------------------|---------------------------------------------------------------------------------------|
| <a href="#">MG939587.1</a><br>AXZ96054.1                   | Pol17_03029_C201<br>Poland                  | Genotype II<br>Wild boar                                      | (Mazur-Panasiuk, Woźniakowski, & Niemczuk, 2019)                                      |
| <a href="#">MK543947.1</a><br>QED90535                     | Belgium/Etalle/wb/2018<br>Belgium           | Genotype II<br>Wild Boar                                      | (Garigliany et al., 2019; Gilliaux et al., 2019)                                      |
| <a href="#">LR722600.1</a><br>VWV94190.1                   | ASFV CzechRepublic 2017/1<br>Czech Republic | Genotype II<br>Wild Boar                                      | (Forth, 2020)                                                                         |
| <a href="#">MK628478.1</a><br>QEY87898.1                   | ASFV/LT14/1490<br>Lithuania                 | Genotype II<br>Wild Boar - Blood                              | (Gallardo et al., 2014)                                                               |
| <a href="#">MN715134.1</a><br>QGV56805.1                   | ASFV_HU_2018<br>Hungary                     | Genotype II<br>Wild Boar - alveolar<br>macrophages            | (Olasz et al., 2019)                                                                  |
| <a href="#">MT459800.1</a><br>QPB67618.1                   | ASFV/Kabardino-Balkaria 19/WB-964<br>Russia | Genotype II<br>Wild Boar - spleen                             | (Malogolovkin, Yelsukova, Gallardo, Tsybanov, & Kolbasov, 2012; Mazloun et al., 2021) |
| <a href="#">MW306191.1</a><br>QUQ60377.1                   | ASFV/Primorsky 19/WB-6723<br>Russia         | Genotype II<br>Wild Boar - spleen                             | (Mazloun et al., 2021)                                                                |
| <a href="#">MW306190.1</a><br>QUQ60197.1                   | ASFV/Amur 19/WB-6905<br>Russia              | Genotype II<br>Wild Boar - spleen                             | (Mazloun et al., 2021)                                                                |
| <a href="#">LS478113.1</a><br>SPS73515.1                   | Estonia 2014<br>Estonia                     | Genotype II<br>Wild Boar                                      | (Nurmoja et al., 2020; Zani et al., 2018)                                             |
| <a href="#">MK645909.1</a><br>QDL88123.1                   | ASFV-wbBS01<br>China                        | Genotype II<br>Wild Boar                                      | (Bao et al., 2019);(Njau et al., 2021)                                                |
| <a href="#">MK940252.1</a><br>QIA61506.1                   | CN/2019/InnerMongolia-AES01-<br>China       | Genotype II<br>Wild Boar                                      | (Tran et al., 2022)                                                                   |
| <a href="#">MW701371.1</a><br>QTZ19752.1                   | ASFV-G-delta177LdeltaLVR<br>Plum Island     | synthetic construct –<br>deletion mutant of<br>Georgia2007//1 | (Borca, 2021)                                                                         |
| <a href="#">MN270973.1</a><br>QIM07715.1                   | 85/Ca/1985<br>Italy: Cagliari, Sardinia     | Genotype I<br>Domestic pig                                    | (Torresi et al., 2020)                                                                |
| <a href="#">MN270974.1</a><br>QIM07948.1                   | 141/Nu/1990<br>Italy: Nuoro, Sardinia       | Genotype I<br>Domestic pig                                    | (Nix, Gallardo, Hutchings, Blanco, & Dixon, 2006;<br>Torresi et al., 2020)            |
| <a href="#">MN270975.1</a><br>QIM08183.1                   | 142/Nu/1995<br>Italy: Nuoro, Sardinia       | Genotype I<br>Domestic pig                                    | (Torresi et al., 2020)                                                                |
| <a href="#">NC_044942.1</a><br>YP_009702497.1              | BA71V<br>Spain: Badajoz                     | Genotype I<br>Domestic pig - spleen                           | (Yanez, 1995)                                                                         |
| <a href="#">NC_044958.1</a><br>YP_009703860.1              | E75<br>Spain                                | Genotype I<br>Domestic pig - spleen                           | (de Villiers et al., 2010)                                                            |
| <a href="#">NC_044941.1</a><br>YP_009702339.1              | L60<br>Portugal                             | Genotype I<br>Domestic pig                                    | (Bastos et al., 2003)                                                                 |
| <a href="#">NC_044943.1</a><br>YP_009702658.1              | NHV<br>Portugal                             | Genotype I<br>Domestic pig                                    | (Portugal et al., 2015)                                                               |
| <a href="#">NC_044956.1</a><br>YP_009703544.1/<br>CAN10191 | Benin 97/1<br>Benin                         | Genotype I<br>Domestic Pig                                    | (Bastos et al., 2003)                                                                 |



|                                                           |                                         |                                                    |                                                   |
|-----------------------------------------------------------|-----------------------------------------|----------------------------------------------------|---------------------------------------------------|
| <a href="#">MZ202520.1</a><br>QZK26792.1                  | K49<br>Zaire - Katanga                  | Genotype I<br>Serogroup 2                          | (Bastos et al., 2003)                             |
| <a href="#">NC_044957.1</a><br>YP_009703699.1             | OURT 88/3<br>Portugal                   | Genotype I<br>Tick                                 | (Boinas, Hutchings, Dixon, & Wilkinson, 2004)     |
| <a href="#">MN913970.1</a><br>QID21266.1                  | Liv13/33 (OmLF2)<br>Zambia, Livingstone | Genotype I<br>Tick                                 | (Chastagner et al., 2020)                         |
| gi 229891462<br><a href="#">AY261366.1</a><br>POCA04.1    | Namibia/Wart80/1980<br>Namibia          | Genotype IV<br>Warthog                             | (Bastos et al., 2003; Zsak et al., 2005)          |
| <a href="#">AY261361.1</a><br>POCA02.1                    | Malawi LIL 20/1<br>Malawi               | Genotype VIII; Haplotype 8a<br>Ticks               | (Haresnape, 1989)                                 |
| <a href="#">NC_044946.1</a><br>YP_009702990.1             | Ken06.Bus<br>Kenya                      | Genotype IX<br>Domestic Pig                        | (Bishop et al., 2015; Gallardo et al., 2009)      |
| <a href="#">MH025920.1</a><br>AXB50010.1                  | R35<br>Uganda: Tororo district          | Genotype IX<br>Domestic pig<br>Blood               | (Masembe et al., 2018)                            |
| <a href="#">MH025918.1</a><br>AXB49666.1                  | R25<br>Uganda: Tororo district          | Genotype IX<br>Domestic pig<br>Blood               | (Masembe et al., 2018)                            |
| <a href="#">LR899131.1</a><br>CAD7112308.1                | ASFV Ken.rie1                           | Genotype X<br>Domestic Pig - Blood                 | (Forth et al., 2020)                              |
| <a href="#">MT956648.1</a><br>QRY19118.1                  | Uvira B53<br>Kivu – DR Congo            | Genotype X<br>Serogroup 7<br>Domestic pig - spleen | (Bisimwa et al., 2020)                            |
| <a href="#">AY261360.1</a><br>POCA01.1gi 229891459        | KEN-50/1950<br>Kenya                    | Genotype X<br>Domestic Pig                         | Kutish G.F. and Rock D.L., 2003                   |
| <a href="#">NC_044945.1</a><br>YP_009702825.1<br>HM745253 | Ken05/Tk1<br>Kenya                      | Genotype X<br>Ticks                                | (Bishop et al., 2015; Gallardo et al., 2009)      |
| gi 229891461<br><a href="#">AY261363.1</a><br>POCA03.1    | Pretoriuskop Pr4/1996<br>South Africa   | Genotype XX<br>Haplotype 20a<br>Ticks              | (Kleiboeker, Burrage, Scoles, Fish, & Rock, 1998) |

**Supplementary Table 2.** Defined IFN- $\gamma$ -inducing pp220 peptides are predicted to bind to multiple *SLA-I* alleles

| <b>Peptide</b>            | <b>Sequence</b> | <b>Aff(nM)</b> | <b>Bind Level</b> | <b><i>SLA-I</i> Allele</b> |
|---------------------------|-----------------|----------------|-------------------|----------------------------|
| p34 <sup>161-169</sup>    | LTHGLRAEY       | 1486.83        | SB                | SLA-1*02:01                |
| p34 <sup>161-169</sup>    | LTHGLRAEY       | 1486.83        | SB                | SLA-1*02:02                |
| p34 <sup>161-169</sup>    | LTHGLRAEY       | 270.87         | SB                | SLA-1*07:01                |
| p34 <sup>161-169</sup>    | LTHGLRAEY       | 270.87         | SB                | SLA-1*07:02                |
| p34 <sup>161-169</sup>    | LTHGLRAEY       | 1495.02        | SB                | SLA-1*08:01                |
| p34 <sup>161-169</sup>    | LTHGLRAEY       | 538.61         | SB                | SLA-1*LWH                  |
| p34 <sup>161-169</sup>    | LTHGLRAEY       | 2054.49        | SB                | SLA-2*01:01                |
| p34 <sup>161-169</sup>    | LTHGLRAEY       | 1397.84        | SB                | SLA-2*01:02                |
| p34 <sup>161-169</sup>    | LTHGLRAEY       | 2046.26        | SB                | SLA-2*03:02                |
| p34 <sup>161-169</sup>    | LTHGLRAEY       | 306.17         | SB                | SLA-2*04:01                |
| p34 <sup>161-169</sup>    | LTHGLRAEY       | 1828.05        | SB                | SLA-2*04:02                |
| p34 <sup>161-169</sup>    | LTHGLRAEY       | 1903.42        | SB                | SLA-2*10:01                |
| p34 <sup>161-169</sup>    | LTHGLRAEY       | 1005.50        | SB                | SLA-2*10:02                |
| p34 <sup>161-169</sup>    | LTHGLRAEY       | 451.91         | SB                | SLA-2*HB:01                |
| p34 <sup>161-169</sup>    | LTHGLRAEY       | 4407.40        | SB                | SLA-2*LWH:AA               |
| p34 <sup>161-169</sup>    | LTHGLRAEY       | 3744.41        | SB                | SLA-2*TPK:AA               |
| p37 <sup>859-867</sup>    | KSMAAKIFI       | 1177.68        | SB                | SLA-2*05:01                |
| p37 <sup>859-867</sup>    | KSMAAKIFI       | 7913.59        | SB                | SLA-2*12:01                |
| p37 <sup>859-867</sup>    | KSMAAKIFI       | 1586.28        | SB                | SLA-2*YC:AA                |
| p37 <sup>859-867</sup>    | KSMAAKIFI       | 1201.01        | SB                | SLA-3*01:01                |
| p37 <sup>859-867</sup>    | KSMAAKIFI       | 2335.79        | SB                | SLA-3*06:02                |
| p150 <sup>1363-1371</sup> | HIDKNIIQY       | 9776.79        | SB                | SLA-1*01:01                |
| p150 <sup>1363-1371</sup> | HIDKNIIQY       | 520.01         | SB                | SLA-1*02:01                |
| p150 <sup>1363-1371</sup> | HIDKNIIQY       | 520.01         | SB                | SLA-1*02:02                |
| p150 <sup>1363-1371</sup> | HIDKNIIQY       | 13.25          | SB                | SLA-1*04:01                |
| p150 <sup>1363-1371</sup> | HIDKNIIQY       | 926.75         | SB                | SLA-1*06:01                |
| p150 <sup>1363-1371</sup> | HIDKNIIQY       | 420.20         | SB                | SLA-1*07:01                |
| p150 <sup>1363-1371</sup> | HIDKNIIQY       | 420.20         | SB                | SLA-1*07:02                |
| p150 <sup>1363-1371</sup> | HIDKNIIQY       | 554.29         | SB                | SLA-1*08:01                |
| p150 <sup>1363-1371</sup> | HIDKNIIQY       | 3350.95        | SB                | SLA-1*12:01                |
| p150 <sup>1363-1371</sup> | HIDKNIIQY       | 303.44         | SB                | SLA-1*13:01                |
| p150 <sup>1363-1371</sup> | HIDKNIIQY       | 2759.77        | SB                | SLA-1*HB:01                |
| p150 <sup>1363-1371</sup> | HIDKNIIQY       | 2038.59        | SB                | SLA-1*HB:02                |
| p150 <sup>1363-1371</sup> | HIDKNIIQY       | 2038.59        | SB                | SLA-1*HB:03                |
| p150 <sup>1363-1371</sup> | HIDKNIIQY       | 2759.77        | SB                | SLA-1*HB:04                |
| p150 <sup>1363-1371</sup> | HIDKNIIQY       | 1181.03        | SB                | SLA-1*LWH                  |

| <b>Peptide</b>            | <b>Sequence</b> | <b>Aff(nM)</b> | <b>Bind Level</b> | <b>SLA-/ Allele</b> |
|---------------------------|-----------------|----------------|-------------------|---------------------|
| p150 <sup>1363-1371</sup> | HIDKNIIQY       | 3227.75        | SB                | SLA-1*YC            |
| p150 <sup>1363-1371</sup> | HIDKNIIQY       | 13.25          | SB                | SLA-1*YDL:01        |
| p150 <sup>1363-1371</sup> | HIDKNIIQY       | 7612.26        | SB                | SLA-2*01:01         |
| p150 <sup>1363-1371</sup> | HIDKNIIQY       | 3376.90        | SB                | SLA-2*01*02         |
| p150 <sup>1363-1371</sup> | HIDKNIIQY       | 1348.91        | SB                | SLA-2*03:02         |
| p150 <sup>1363-1371</sup> | HIDKNIIQY       | 6358.65        | SB                | SLA-2*04:01         |
| p150 <sup>1363-1371</sup> | HIDKNIIQY       | 5207.98        | SB                | SLA-2*10:01         |
| p150 <sup>1363-1371</sup> | HIDKNIIQY       | 220.50         | SB                | SLA-2*10:02         |
| p150 <sup>1363-1371</sup> | HIDKNIIQY       | 213.00         | SB                | SLA-2*HB:01         |
| p150 <sup>1363-1371</sup> | HIDKNIIQY       | 8411.18        | SB                | SLA-2*LWH:AA        |
| p150 <sup>1363-1371</sup> | HIDKNIIQY       | 14014.36       | SB                | SLA-2*TPK:AA        |
| p150 <sup>1363-1371</sup> | HIDKNIIQY       | 13.25          | SB                | SLA-2*YDL:AA        |
| p150 <sup>1363-1371</sup> | HIDKNIIQY       | 13.25          | SB                | SLA-2*YDL:02        |
| p150 <sup>1363-1371</sup> | HIDKNIIQY       | 20574.55       | SB                | SLA-3*03:02         |
| p150 <sup>1363-1371</sup> | HIDKNIIQY       | 2759.77        | SB                | SLA-3*LWH           |
| p150 <sup>1463-1471</sup> | RVFSRLV FY      | 168.64         | SB                | SLA-1*02:01         |
| p150 <sup>1463-1471</sup> | RVFSRLV FY      | 168.64         | SB                | SLA-1*02:02         |
| p150 <sup>1463-1471</sup> | RVFSRLV FY      | 157.58         | SB                | SLA-1*04:01         |
| p150 <sup>1463-1471</sup> | RVFSRLV FY      | 1041.78        | SB                | SLA-1*05:01         |
| p150 <sup>1463-1471</sup> | RVFSRLV FY      | 1255.39        | SB                | SLA-1*06:01         |
| p150 <sup>1463-1471</sup> | RVFSRLV FY      | 84.92          | SB                | SLA-1*07:01         |
| p150 <sup>1463-1471</sup> | RVFSRLV FY      | 84.92          | SB                | SLA-1*07:02         |
| p150 <sup>1463-1471</sup> | RVFSRLV FY      | 402.78         | SB                | SLA-1*08:01         |
| p150 <sup>1463-1471</sup> | RVFSRLV FY      | 319.31         | SB                | SLA-1*12:01         |
| p150 <sup>1463-1471</sup> | RVFSRLV FY      | 1212.39        | SB                | SLA-1*13:01         |
| p150 <sup>1463-1471</sup> | RVFSRLV FY      | 1181.63        | SB                | SLA-1*HB:01         |
| p150 <sup>1463-1471</sup> | RVFSRLV FY      | 808.38         | SB                | SLA-1*HB:02         |
| p150 <sup>1463-1471</sup> | RVFSRLV FY      | 808.38         | SB                | SLA-1*HB:03         |
| p150 <sup>1463-1471</sup> | RVFSRLV FY      | 1181.63        | SB                | SLA-1*HB:04         |
| p150 <sup>1463-1471</sup> | RVFSRLV FY      | 248.15         | SB                | SLA-1*LWH           |
| p150 <sup>1463-1471</sup> | RVFSRLV FY      | 813.92         | SB                | SLA-1*YC            |
| p150 <sup>1463-1471</sup> | RVFSRLV FY      | 157.58         | SB                | SLA-1*YDL:01        |
| p150 <sup>1463-1471</sup> | RVFSRLV FY      | 548.67         | SB                | SLA-2*01:01         |
| p150 <sup>1463-1471</sup> | RVFSRLV FY      | 130.67         | SB                | SLA-2*01:02         |
| p150 <sup>1463-1471</sup> | RVFSRLV FY      | 463.66         | SB                | SLA-2*03:02         |
| p150 <sup>1463-1471</sup> | RVFSRLV FY      | 314.89         | SB                | SLA-2*04:01         |
| p150 <sup>1463-1471</sup> | RVFSRLV FY      | 1264.22        | SB                | SLA-2*04:02         |
| p150 <sup>1463-1471</sup> | RVFSRLV FY      | 730.71         | SB                | SLA-2*10:01         |
| p150 <sup>1463-1471</sup> | RVFSRLV FY      | 108.09         | SB                | SLA-2*10:02         |
| p150 <sup>1463-1471</sup> | RVFSRLV FY      | 61.50          | SB                | SLA-2*HB:01         |

| <b>Peptide</b>            | <b>Sequence</b> | <b>Aff(nM)</b> | <b>Bind Level</b> | <b>SLA-I Allele</b> |
|---------------------------|-----------------|----------------|-------------------|---------------------|
| p150 <sup>1463-1471</sup> | RVFSRLV FY      | 1138.60        | SB                | SLA-2*LWH:AA        |
| p150 <sup>1463-1471</sup> | RVFSRLV FY      | 5781.27        | SB                | SLA-2*TPK:AA        |
| p150 <sup>1463-1471</sup> | RVFSRLV FY      | 157.58         | SB                | SLA-2*YDL:AA        |
| p150 <sup>1463-1471</sup> | RVFSRLV FY      | 814.61         | SB                | SLA-2*YDY:AA        |
| p150 <sup>1463-1471</sup> | RVFSRLV FY      | 157.58         | SB                | SLA-2*YDL:02        |
| p150 <sup>1463-1471</sup> | RVFSRLV FY      | 2479.14        | SB                | SLA-3*03:01         |
| p150 <sup>1463-1471</sup> | RVFSRLV FY      | 3692.27        | SB                | SLA-3*03:02         |
| p150 <sup>1463-1471</sup> | RVFSRLV FY      | 2479.14        | SB                | SLA-3*03:03         |
| p150 <sup>1463-1471</sup> | RVFSRLV FY      | 3223.21        | SB                | SLA-*.03:04         |
| p150 <sup>1463-1471</sup> | RVFSRLV FY      | 1229.98        | SB                | SLA-3*04:01         |
| p150 <sup>1463-1471</sup> | RVFSRLV FY      | 814.61         | SB                | SLA-3*06:01         |
| p150 <sup>1463-1471</sup> | RVFSRLV FY      | 4138.02        | SB                | SLA-3*06:02         |
| p150 <sup>1463-1471</sup> | RVFSRLV FY      | 1871.42        | SB                | SLA-3*07:01         |
| p150 <sup>1463-1471</sup> | RVFSRLV FY      | 814.61         | SB                | SLA-3*CDY           |
| p150 <sup>1463-1471</sup> | RVFSRLV FY      | 1181.63        | SB                | SLA-3*LWH           |
| p150 <sup>1463-1471</sup> | RVFSRLV FY      | 1301.51        | SB                | SLA-3*YC            |
| p150 <sup>1463-1471</sup> | RVFSRLV FY      | 814.61         | SB                | SLA-3*YDY:01        |
| p150 <sup>1463-1471</sup> | RVFSRLV FY      | 814.61         | SB                | SLA-3*YDY:02        |
| p150 <sup>1463-1471</sup> | RVFSRLV FY      | 1871.42        | SB                | SLA-3*YTH           |

The mapped IFN- $\gamma$ -inducing nanomer peptides from ASFV pp220 (Georgia 2007/1) were predicted for *SLA-I* binding using NetMHCpan version 4.1 (<https://services.healthtech.dtu.dk/service.php?NetMHCpan-4.1>). Input type used was "Peptide" with the threshold for strong binders set at less than 0.5% Rank and for weak binders less than 2% Rank, but greater than 0.5% as are the default binding thresholds proven for MHC class I. Binding affinity and sorting were applied to filter for strong (SB) allele binders shown in the above table.
